# Supplementary material for: CD99 Modulates the Proteomic Landscape of Ewing Sarcoma Cells and Related Extracellular Vesicles
Source: MDPI journal article supplement (doi:10.3390/ijms25031588), 2024-01-27
Supplement: s1 [file s1]

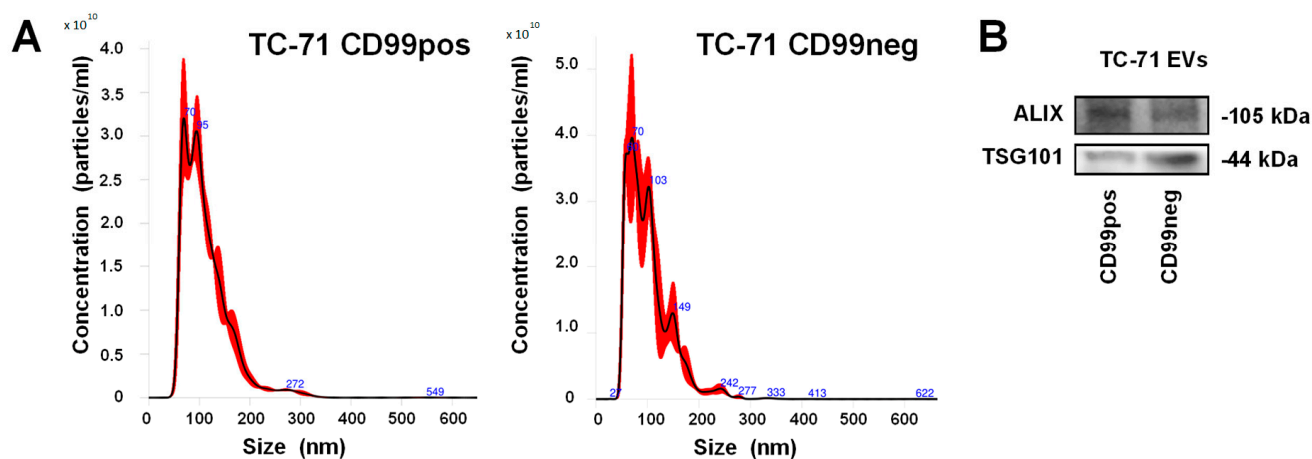

**Supplementary Figure S1.** (A) Nanoparticle tracking analysis of size distribution and concentration of EVs from TC-71 CD99pos (mean nm diameter (nm):  $112.7 \pm 2.9$ ; concentration:  $2.53 \times 10^{12} \pm 1.90 \times 10^{11}$ ) and TC-71 CD99neg (mean diameter (nm):  $101.3 \pm 0.6$ ; concentration:  $2.92 \times 10^{12} \pm 1.48 \times 10^{11}$ ) cells. (B) Western blot depicting the expression of EVs markers ALIX and TSG101 in EVs extracted from TC-71 CD99pos and TC-71 CD99neg cells.
