# Supplementary material for: CD99 Modulates the Proteomic Landscape of Ewing Sarcoma Cells and Related Extracellular Vesicles
Source: Int J Mol Sci. 2024 Jan 27;25(3):1588. doi: 10.3390/ijms25031588 (PMC10855178; doi:10.3390/ijms25031588)
Supplement: Supplementary file 1 [file ijms-25-01588-s001.zip]

Archive with 5 entries (5 files):
- Figure S1.pdf
- Table S1.xls
- Table S2.xlsx
- Table S3.xlsx
- Table S4.xls
