# Supplementary material for: CD99 Modulates the Proteomic Landscape of Ewing Sarcoma Cells and Related Extracellular Vesicles
Source: Int J Mol Sci. 2024 Jan 27;25(3):1588. doi: 10.3390/ijms25031588 (PMC10855178; doi:10.3390/ijms25031588)
Supplement: Supplementary file 1 [file ijms-25-01588-s001.zip › Table S1.xls]

## Sheet: Table S1
	Table S1. GO biological processes of the 54 differentially expressed proteins in CD99neg versus CD99pos TC-71 cells.
category	ID	term	count	proteins	logFC
BP	GO:0043536	positive regulation of blood vessel endothelial cell migration	4	ANXA1	0.774
BP	GO:0043536	positive regulation of blood vessel endothelial cell migration	4	HMGB1	-0.717
BP	GO:0043536	positive regulation of blood vessel endothelial cell migration	4	HSPB1	0.914
BP	GO:0043536	positive regulation of blood vessel endothelial cell migration	4	TMSB4X	4.97
BP	GO:0035767	endothelial cell chemotaxis	3	HMGB1	-0.717
BP	GO:0035767	endothelial cell chemotaxis	3	HSPB1	0.914
BP	GO:0035767	endothelial cell chemotaxis	3	TMSB4X	4.97
BP	GO:0043254	regulation of protein-containing complex assembly	7	ARL3	-0.913
BP	GO:0043254	regulation of protein-containing complex assembly	7	CAPG	0.832
BP	GO:0043254	regulation of protein-containing complex assembly	7	FSCN1	-0.697
BP	GO:0043254	regulation of protein-containing complex assembly	7	HMGB1	-0.717
BP	GO:0043254	regulation of protein-containing complex assembly	7	HSPA1B	1.11
BP	GO:0043254	regulation of protein-containing complex assembly	7	PFN2	-1.1
BP	GO:0043254	regulation of protein-containing complex assembly	7	TMSB4X	4.97
BP	GO:0032677	regulation of interleukin-8 production	4	ANXA1	0.774
BP	GO:0032677	regulation of interleukin-8 production	4	HMGB1	-0.717
BP	GO:0032677	regulation of interleukin-8 production	4	HSPA1B	1.11
BP	GO:0032677	regulation of interleukin-8 production	4	TMSB4X	4.97
BP	GO:0032637	interleukin-8 production	4	ANXA1	0.774
BP	GO:0032637	interleukin-8 production	4	HMGB1	-0.717
BP	GO:0032637	interleukin-8 production	4	HSPA1B	1.11
BP	GO:0032637	interleukin-8 production	4	TMSB4X	4.97
BP	GO:0060326	cell chemotaxis	6	ANXA1	0.774
BP	GO:0060326	cell chemotaxis	6	HMGB1	-0.717
BP	GO:0060326	cell chemotaxis	6	HSPB1	0.914
BP	GO:0060326	cell chemotaxis	6	MIF	-0.863
BP	GO:0060326	cell chemotaxis	6	PLEC	-1.45
BP	GO:0060326	cell chemotaxis	6	TMSB4X	4.97
BP	GO:0031532	actin cytoskeleton reorganization	4	ANXA1	0.774
BP	GO:0031532	actin cytoskeleton reorganization	4	ARHGDIB	1.18
BP	GO:0031532	actin cytoskeleton reorganization	4	EZR	0.712
BP	GO:0031532	actin cytoskeleton reorganization	4	PLEC	-1.45
BP	GO:0001667	ameboidal-type cell migration	7	ANXA1	0.774
BP	GO:0001667	ameboidal-type cell migration	7	ARHGDIB	1.18
BP	GO:0001667	ameboidal-type cell migration	7	HMGB1	-0.717
BP	GO:0001667	ameboidal-type cell migration	7	HSPB1	0.914
BP	GO:0001667	ameboidal-type cell migration	7	PFN2	-1.1
BP	GO:0001667	ameboidal-type cell migration	7	PLEC	-1.45
BP	GO:0001667	ameboidal-type cell migration	7	TMSB4X	4.97
BP	GO:0032271	regulation of protein polymerization	5	ARL3	-0.913
BP	GO:0032271	regulation of protein polymerization	5	CAPG	0.832
BP	GO:0032271	regulation of protein polymerization	5	HSPA1B	1.11
BP	GO:0032271	regulation of protein polymerization	5	PFN2	-1.1
BP	GO:0032271	regulation of protein polymerization	5	TMSB4X	4.97
BP	GO:0010595	positive regulation of endothelial cell migration	4	ANXA1	0.774
BP	GO:0010595	positive regulation of endothelial cell migration	4	HMGB1	-0.717
BP	GO:0010595	positive regulation of endothelial cell migration	4	HSPB1	0.914
BP	GO:0010595	positive regulation of endothelial cell migration	4	TMSB4X	4.97
