# Supplementary material for: CD99 Modulates the Proteomic Landscape of Ewing Sarcoma Cells and Related Extracellular Vesicles
Source: Int J Mol Sci. 2024 Jan 27;25(3):1588. doi: 10.3390/ijms25031588 (PMC10855178; doi:10.3390/ijms25031588)
Supplement: Supplementary file 1 [file ijms-25-01588-s001.zip › Table S2.xlsx]

## Sheet: Table S2
Table S2. Functional annotation of the 41 cell/EV common proteins in CD99neg variant.
Category	ID	Term	Proteins	Count	adj_pval
GOALL	GO:0034774	secretory granule lumen	A2M,C3,APOA1,FGG,AHSG,ALB,LTF,ALDOA,TUBB,HSP90AA1,HSP90AB1,HSPA8,ACTN1,PKM,PSMA5,PPIA,TUBB4B,ITIH3	18	1.2159e-19
GOALL	GO:0060205	cytoplasmic vesicle lumen	A2M,C3,APOA1,FGG,AHSG,ALB,LTF,ALDOA,TUBB,HSP90AA1,HSP90AB1,HSPA8,ACTN1,PKM,PSMA5,PPIA,TUBB4B,ITIH3	18	1.2159e-19
GOALL	GO:0031983	vesicle lumen	A2M,C3,APOA1,FGG,AHSG,ALB,LTF,ALDOA,TUBB,HSP90AA1,HSP90AB1,HSPA8,ACTN1,PKM,PSMA5,PPIA,TUBB4B,ITIH3	18	1.2159e-19
GOALL	GO:0043312	neutrophil degranulation	C3,AHSG,LTF,ALDOA,KRT1,TUBB,HSP90AA1,HSP90AB1,HSPA8,IGF2R,PKM,PSMA5,PPIA,TUBB4B	14	4.54449e-11
GOALL	GO:0002283	neutrophil activation involved in immune response	C3,AHSG,LTF,ALDOA,KRT1,TUBB,HSP90AA1,HSP90AB1,HSPA8,IGF2R,PKM,PSMA5,PPIA,TUBB4B	14	4.54449e-11
GOALL	GO:0002446	neutrophil mediated immunity	C3,AHSG,LTF,ALDOA,KRT1,TUBB,HSP90AA1,HSP90AB1,HSPA8,IGF2R,PKM,PSMA5,PPIA,TUBB4B	14	4.91789e-11
GOALL	GO:0042119	neutrophil activation	C3,AHSG,LTF,ALDOA,KRT1,TUBB,HSP90AA1,HSP90AB1,HSPA8,IGF2R,PKM,PSMA5,PPIA,TUBB4B	14	4.91789e-11
GOALL	GO:0002576	platelet degranulation	A2M,APOA1,FGG,AHSG,ALB,ALDOA,ACTN1,FLNA,TAGLN2,TUBA4A,ITIH3,TLN1	12	3.91575e-15
GOALL	GO:0072562	blood microparticle	A2M,C3,APOA1,FGG,AHSG,ALB,VTN,KRT1,PFN1,C4A,HSPA8,PZP	12	1.58874e-14
GOALL	GO:0043687	post-translational protein modification	PSMA7,C3,APOA1,FGG,AHSG,ALB,C4A,PSMA1,PSMA4,PSMA5,PSMA6	11	1.0076e-08
