# Supplementary material for: CD99 Modulates the Proteomic Landscape of Ewing Sarcoma Cells and Related Extracellular Vesicles
Source: Int J Mol Sci. 2024 Jan 27;25(3):1588. doi: 10.3390/ijms25031588 (PMC10855178; doi:10.3390/ijms25031588)
Supplement: Supplementary file 1 [file ijms-25-01588-s001.zip › Table S3.xlsx]

## Sheet: TableS3
Table S3. Functional annotation of the 57 cell/EV common proteins in CD99pos variant.
Category	ID	Term	Proteins	Count	adj_pval
GOALL	GO:0034774	secretory granule lumen	A2M,C3,APOA1,FGG,AHSG,ALB,LTF,ALDOA,TUBB,HSP90AA1,HSP90AB1,HSPA8,ACTN1,PKM,VCL,PSMB1,PSMA2,PSMA5,GDI2,PPIA,TUBB4B,ITIH3	22	6.52807e-23
GOALL	GO:0060205	cytoplasmic vesicle lumen	A2M,C3,APOA1,FGG,AHSG,ALB,LTF,ALDOA,TUBB,HSP90AA1,HSP90AB1,HSPA8,ACTN1,PKM,VCL,PSMB1,PSMA2,PSMA5,GDI2,PPIA,TUBB4B,ITIH3	22	6.52807e-23
GOALL	GO:0031983	vesicle lumen	A2M,C3,APOA1,FGG,AHSG,ALB,LTF,ALDOA,TUBB,HSP90AA1,HSP90AB1,HSPA8,ACTN1,PKM,VCL,PSMB1,PSMA2,PSMA5,GDI2,PPIA,TUBB4B,ITIH3	22	6.52807e-23
GOALL	GO:0043312	neutrophil degranulation	C3,AHSG,LTF,ALDOA,KRT1,TUBB,HSP90AA1,HSP90AB1,HSPA8,IGF2R,PKM,VCL,PSMB1,PSMA2,PSMA5,GDI2,RAP1B,PPIA,TUBB4B	19	1.79614e-15
GOALL	GO:0043687	post-translational protein modification	PSMA7,C3,APOA1,FGG,AHSG,ALB,C4A,HSP90B1,PSMB1,PSMA1,PSMA2,PSMA3,PSMA4,PSMA5,PSMB4,PSMB5,PSMB3,PSMA6	18	3.79677e-16
GOALL	GO:0010389	regulation of mitotic entry	PSMA7,TUBB,HSP90AA1,PSMB1,PSMA1,PSMA2,PSMA3,PSMA4,PSMA5,PSMB4,PSMB5,PSMB3,PSMA6,TUBA4A,TUBB4B	15	1.03446e-15
GOALL	GO:0005839	proteasome core complex	PSMA7,PSMB1,PSMA1,PSMA2,PSMA3,PSMA4,PSMA5,PSMB4,PSMB5,PSMB3,PSMA6	11	1.27637e-21
GOALL	GO:0010499	proteasomal ubiquitin-independent protein catabolic process	PSMA7,PSMB1,PSMA1,PSMA2,PSMA3,PSMA4,PSMA5,PSMB4,PSMB5,PSMB3,PSMA6	11	4.27186e-21
GOALL	GO:0000502	proteasome complex	PSMA7,PSMB1,PSMA1,PSMA2,PSMA3,PSMA4,PSMA5,PSMB4,PSMB5,PSMB3,PSMA6	11	1.58128e-15
GOALL	GO:0006521	regulation of cellular amino acid metabolic process	PSMA7,PSMB1,PSMA1,PSMA2,PSMA3,PSMA4,PSMA5,PSMB4,PSMB5,PSMB3,PSMA6	11	1.58128e-15
