# Supplementary material for: CD99 Modulates the Proteomic Landscape of Ewing Sarcoma Cells and Related Extracellular Vesicles
Source: Int J Mol Sci. 2024 Jan 27;25(3):1588. doi: 10.3390/ijms25031588 (PMC10855178; doi:10.3390/ijms25031588)
Supplement: Supplementary file 1 [file ijms-25-01588-s001.zip › Table S4.xls]

## Sheet: Table S4
Table S4. GO biological processes of the 55 differentially expressed proteins in CD99neg versus CD99pos TC-71 EVs.
category	ID	term	count	proteins	logFC
BP	GO:0052547	regulation of peptidase activity	16	A2M	0.71
BP	GO:0052547	regulation of peptidase activity	16	C3P1	0.713
BP	GO:0052547	regulation of peptidase activity	16	C4A	-0.89
BP	GO:0052547	regulation of peptidase activity	16	FN1	-0.9
BP	GO:0052547	regulation of peptidase activity	16	GPI	0.94
BP	GO:0052547	regulation of peptidase activity	16	GSN	0.921
BP	GO:0052547	regulation of peptidase activity	16	ITIH1	1.17
BP	GO:0052547	regulation of peptidase activity	16	ITIH2	0.832
BP	GO:0052547	regulation of peptidase activity	16	ITIH3	1.38
BP	GO:0052547	regulation of peptidase activity	16	LRP1	-1.74
BP	GO:0052547	regulation of peptidase activity	16	LTF	1.43
BP	GO:0052547	regulation of peptidase activity	16	PSMA3	-2.02
BP	GO:0052547	regulation of peptidase activity	16	PZP	0.892
BP	GO:0052547	regulation of peptidase activity	16	SERPINC1	1.31
BP	GO:0052547	regulation of peptidase activity	16	SERPIND1	0.802
BP	GO:0052547	regulation of peptidase activity	16	SERPINF2	0.596
BP	GO:0051346	negative regulation of hydrolase activity	13	A2M	0.71
BP	GO:0051346	negative regulation of hydrolase activity	13	C3P1	0.713
BP	GO:0051346	negative regulation of hydrolase activity	13	C4A	-0.89
BP	GO:0051346	negative regulation of hydrolase activity	13	GPI	0.94
BP	GO:0051346	negative regulation of hydrolase activity	13	ITIH1	1.17
BP	GO:0051346	negative regulation of hydrolase activity	13	ITIH2	0.832
BP	GO:0051346	negative regulation of hydrolase activity	13	ITIH3	1.38
BP	GO:0051346	negative regulation of hydrolase activity	13	LRP1	-1.74
BP	GO:0051346	negative regulation of hydrolase activity	13	LTF	1.43
BP	GO:0051346	negative regulation of hydrolase activity	13	PZP	0.892
BP	GO:0051346	negative regulation of hydrolase activity	13	SERPINC1	1.31
BP	GO:0051346	negative regulation of hydrolase activity	13	SERPIND1	0.802
BP	GO:0051346	negative regulation of hydrolase activity	13	SERPINF2	0.596
BP	GO:0010498	proteasomal protein catabolic process	11	HSPA1A	-0.633
BP	GO:0010498	proteasomal protein catabolic process	11	PSMA1	-0.941
BP	GO:0010498	proteasomal protein catabolic process	11	PSMA2	-1.19
BP	GO:0010498	proteasomal protein catabolic process	11	PSMA3	-2.02
BP	GO:0010498	proteasomal protein catabolic process	11	PSMA4	-0.711
BP	GO:0010498	proteasomal protein catabolic process	11	PSMA5	-1.37
BP	GO:0010498	proteasomal protein catabolic process	11	PSMA6	-1.43
BP	GO:0010498	proteasomal protein catabolic process	11	PSMA7	-1.61
BP	GO:0010498	proteasomal protein catabolic process	11	PSMB1	-1.72
BP	GO:0010498	proteasomal protein catabolic process	11	PSMB3	-1.03
BP	GO:0010498	proteasomal protein catabolic process	11	PSMB5	-0.904
BP	GO:0050817	coagulation	8	APOH	1.03
BP	GO:0050817	coagulation	8	F10	-1.11
BP	GO:0050817	coagulation	8	FGG	-2.16
BP	GO:0050817	coagulation	8	FLNA	-1.2
BP	GO:0050817	coagulation	8	FN1	-0.9
BP	GO:0050817	coagulation	8	SERPINC1	1.31
BP	GO:0050817	coagulation	8	SERPIND1	0.802
BP	GO:0050817	coagulation	8	SERPINF2	0.596
BP	GO:0042060	wound healing	10	APOH	1.03
BP	GO:0042060	wound healing	10	COL1A1	0.71
BP	GO:0042060	wound healing	10	F10	-1.11
BP	GO:0042060	wound healing	10	FGG	-2.16
BP	GO:0042060	wound healing	10	FLNA	-1.2
BP	GO:0042060	wound healing	10	FN1	-0.9
BP	GO:0042060	wound healing	10	SERPINC1	1.31
BP	GO:0042060	wound healing	10	SERPIND1	0.802
BP	GO:0042060	wound healing	10	SERPINF2	0.596
BP	GO:0042060	wound healing	10	TNC	-1.58
BP	GO:0050878	regulation of body fluid levels	9	APOH	1.03
BP	GO:0050878	regulation of body fluid levels	9	F10	-1.11
BP	GO:0050878	regulation of body fluid levels	9	FGG	-2.16
BP	GO:0050878	regulation of body fluid levels	9	FLNA	-1.2
BP	GO:0050878	regulation of body fluid levels	9	FN1	-0.9
BP	GO:0050878	regulation of body fluid levels	9	GPI	0.94
BP	GO:0050878	regulation of body fluid levels	9	SERPINC1	1.31
BP	GO:0050878	regulation of body fluid levels	9	SERPIND1	0.802
BP	GO:0050878	regulation of body fluid levels	9	SERPINF2	0.596
BP	GO:0006959	humoral immune response	7	A2M	0.71
BP	GO:0006959	humoral immune response	7	C4A	-0.89
BP	GO:0006959	humoral immune response	7	C6	-1.04
BP	GO:0006959	humoral immune response	7	CFH	-0.714
BP	GO:0006959	humoral immune response	7	DMBT1	-0.766
BP	GO:0006959	humoral immune response	7	GPI	0.94
BP	GO:0006959	humoral immune response	7	LTF	1.43
BP	GO:0032963	collagen metabolic process	4	COL1A1	0.71
BP	GO:0032963	collagen metabolic process	4	MRC2	-1.16
BP	GO:0032963	collagen metabolic process	4	SERPINF2	0.596
BP	GO:0032963	collagen metabolic process	4	TNXB	-1.33
BP	GO:0032526	response to retinoic acid	4	COL1A1	0.71
BP	GO:0032526	response to retinoic acid	4	RBP4	1.5
BP	GO:0032526	response to retinoic acid	4	TIE1	0.878
BP	GO:0032526	response to retinoic acid	4	TNC	-1.58
BP	GO:0002526	acute inflammatory response	4	FN1	-0.9
BP	GO:0002526	acute inflammatory response	4	HP	-1.07
BP	GO:0002526	acute inflammatory response	4	SERPINC1	1.31
BP	GO:0002526	acute inflammatory response	4	SERPINF2	0.596
